# Supplementary material
Source: publisher figshare collection journal article supplement (https://tandf.figshare.com/ndownloader/files/20088449)
Supplement: Supplementary file 1 [file 20088449]

S1. The XRD patterns of the red, yellow, white and black (4% masterbatch) propylene BCF yarns


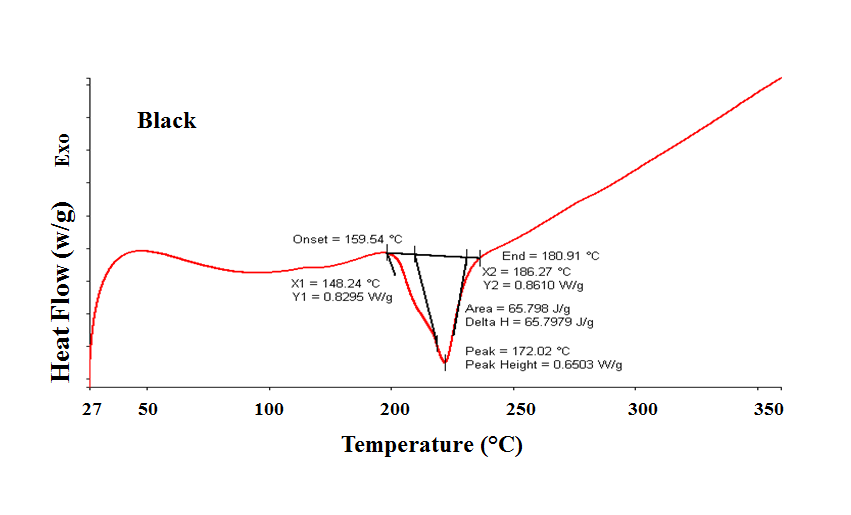

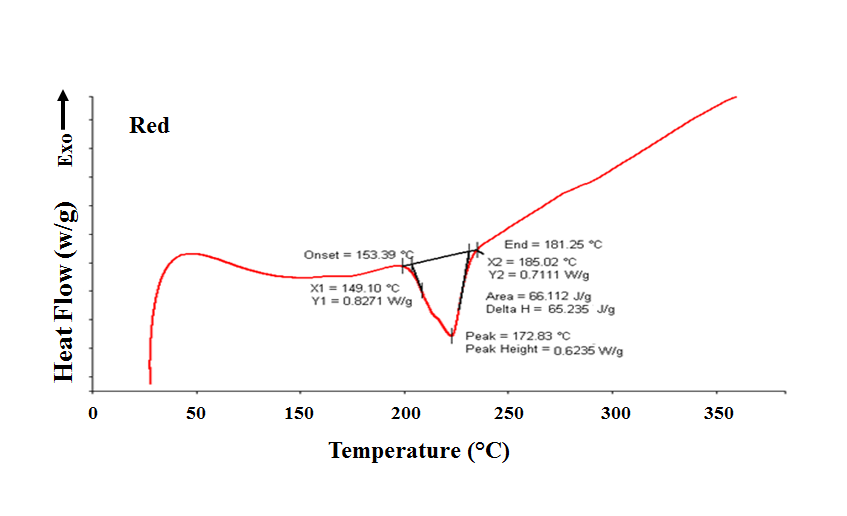

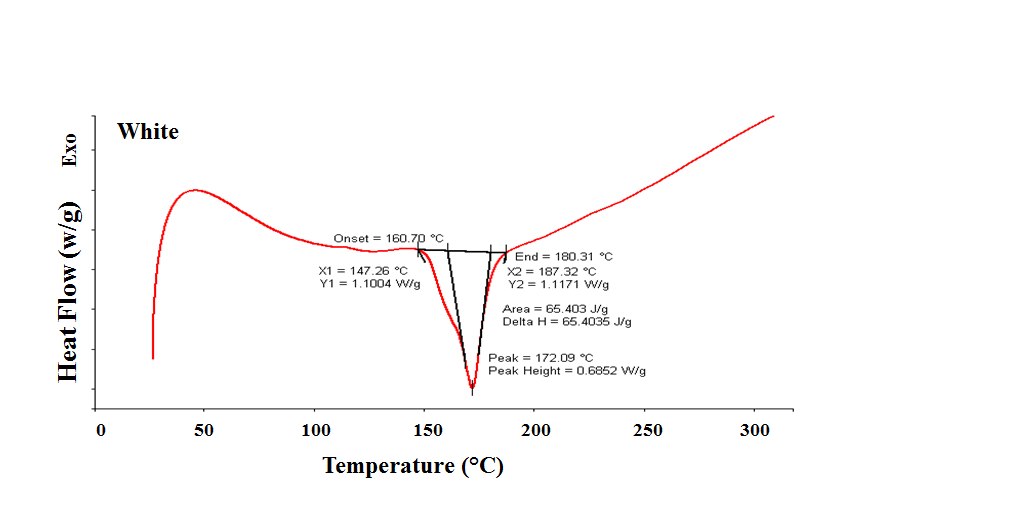

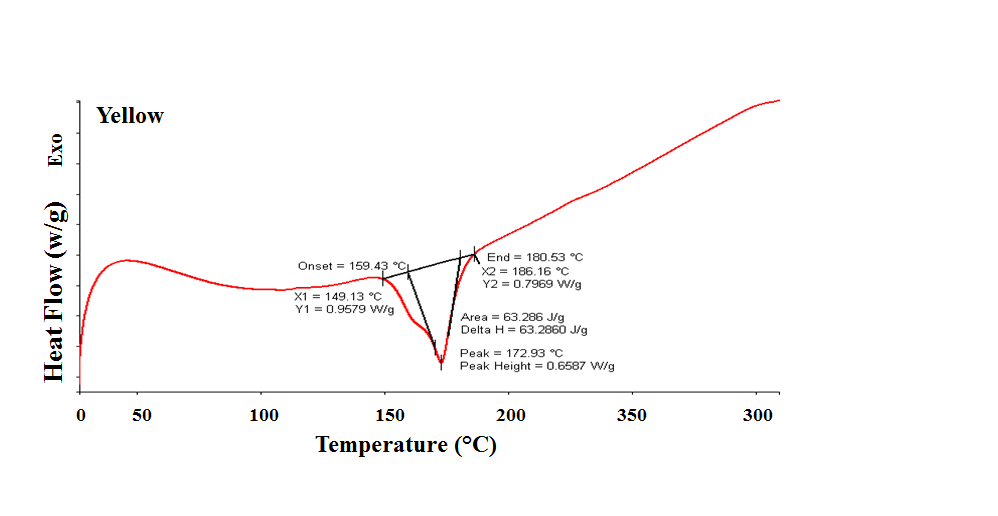


**Heat Flow (w/g) Exo**

S2. DSC thermograms of the black, red, white and yellow (4% masterbatch) propylene BCF yarns

S3. FTIR spectra of five pigments employed in this work
